# Supplementary material for: Cultivation and Genomic Analysis of “Candidatus Nitrosocaldus islandicus,” an Obligately Thermophilic, Ammonia-Oxidizing Thaumarchaeon from a Hot Spring Biofilm in Graendalur Valley, Iceland
Source: PubMed Central journal article supplement (PMC5817080; doi:10.3389/fmicb.2018.00193), 2018-02-14
Supplement: Presentation_1.pdf [file Presentation_1.pdf]

## Supplemental information

**Table S1. Thaumarchaeota used for comparison of protein coding genes**

| Organism Name                                      | Publication                         | BioSample    | BioProject  | Assembly        |
|----------------------------------------------------|-------------------------------------|--------------|-------------|-----------------|
| Thaumarchaeota archaeon casp-thauma1 (Caspian Sea) | 10.7717/peerj.2687                  | SAMN03733542 | PRJNA279271 | GCA_001510225.1 |
| Nitrosopumilus sp. BACL13 MAG-121220-bin23         | 10.1186/s13059-015-0834-7           | SAMN03741946 | PRJNA273799 | GCA_001437625.1 |
| Ca. Nitrosomarinus catalina                        | 10.1111/1462-2920.13768             | SAMN05730076 | PRJNA341864 | GCA_002156965.1 |
| Ca. Nitrosopumilus sp. AR2                         | 10.1128/JB.01869-12                 | SAMN02603138 | PRJNA174388 | GCA_000299395.1 |
| Ca. Nitrosopumilus adriaticus                      | 10.1038/ismej.2015.200              | SAMN03253153 | PRJNA269341 | GCA_000956175.1 |
| Ca. Nitrosopumilus salaria BD31                    | 10.1128/JB.00013-12.                | SAMN00016669 | PRJNA50075  | GCA_000242875.3 |
| Ca. Nitrosopumilus piranensis                      | 10.1038/ismej.2015.200              | SAMN03257648 | PRJNA269924 | GCA_000875775.1 |
| Ca. Nitrosopumilus koreensis AR1                   | 10.1128/JB.01857-12                 | SAMN02603137 | PRJNA174387 | GCA_000299365.1 |
| Marine Group I thaumarchaeote SCGC RSA3 (Red Sea)  | 10.1038/ismej.2014.137              | SAMN02869648 | PRJNA248555 | GCA_000746745.1 |
| Nitrosopumilus maritimus SCM1                      | 10.1073/pnas.0913533107             | SAMN00000032 | PRJNA19265  | GCA_000018465.1 |
| Thaumarchaeota archaeon SCGC AAA282-K18            | 10.3389/fmicb.2016.00143            | SAMN02440765 | PRJNA190793 | GCA_000484975.1 |
| Ca. Nitrosoarchaeum limnia BG20                    | 10.1128/JB.00007-12.                | SAMN00016663 | PRJNA50027  | GCA_000241145.2 |
| Ca. Nitrosoarchaeum limnia SFB1                    | 10.1371/journal.pone.0016626.       | SAMN02471010 | PRJNA52465  | GCA_000204585.1 |
| Ca. Nitrosoarchaeum koreensis MY1                  | 10.1128/JB.05717-11.                | SAMN02470178 | PRJNA67913  | GCA_000220175.2 |
| Ca. Cenarchaeum symbiosum A                        | 10.1073/pnas.0608549103             | SAMN02744041 | PRJNA202    | GCA_000200715.1 |
| Thaumarchaeota archaeon SCGC AAA007-O23            | 10.3389/fmicb.2016.00143            | SAMN02440520 | PRJNA66857  | GCA_000402075.1 |
| Marine Group I thaumarchaeote SCGC AB-629-I23      | 10.1038/ismej.2014.137              | SAMN02441296 | PRJNA165501 | GCA_000399765.1 |
| Thaumarchaeota archaeon SCGC AAA287-E17            | 10.3389/fmicb.2016.00143            | SAMN02441105 | PRJNA190806 | GCA_000484935.1 |
| Nitrosopelagicus sp. REDSEA-S31_B2                 | 10.1038/sdata.2016.50, PMC: 4932879 | SAMN04534603 | PRJNA289734 | GCA_001627235.1 |
| Ca. Nitrosopelagicus brevis                        | 10.1073/pnas.1416223112             | SAMN03273964 | PRJNA223412 | GCA_000812185.1 |
| Thaumarchaeota archaeon CSP1-1 (sediment)          | 10.1111/1462-2920.12930             | SAMN03462092 | PRJNA262935 | GCA_001443365.1 |
| Ca. Nitrosotenuis cloacae                          | 10.1038/srep23747                   | SAMN03286947 | PRJNA272771 | GCA_000955905.3 |
| Ca. Nitrosotenuis uzonensis N4                     | 10.1371/journal.pone.0080835        | SAMEA3139018 | PRJEB4650   | GCA_000723185.1 |
| Ca. Nitrosotenuis chungbukensis MY2                | 10.1128/AEM.03730-13                | SAMN02767256 | PRJNA210247 | GCA_000685395.1 |
| Ca. Nitrosotalea devanaterra                       | 10.1128/AEM.04031-15                | SAMEA3577360 | PRJEB10948  | GCA_900065925.1 |
| Ca. Nitrososphaera evergladensis SR1               | 10.1371/journal.pone.0101648        | SAMN03081530 | PRJNA235208 | GCA_000730285.1 |
| Nitrososphaera viennensis EN76                     | 10.1073/pnas.1601212113             | SAMN02721150 | PRJEA60103  | GCA_000698785.1 |
| Nitrososphaera gargensis Ga9.2                     | 10.1111/j.1462-2920.2012.02893.x    | SAMN02603264 | PRJNA60505  | GCA_000303155.1 |
| Ca. Nitrosocosmicus exaquare G61                   | 10.1038/ismej.2016.192              | SAMN04606696 | PRJNA317395 | GCA_001870125.1 |
| Ca. Nitrosocosmicus oleophilus MY3                 | 10.1111/1758-2229.12477             | SAMN03074222 | PRJNA210256 | GCA_000802205.2 |

**Table S2. Marker genes used for phylogenomic tree**

| <b>Gene</b>                            | <b>Pfam Id</b> | <b>Length</b> | <b>Description</b>                        |
|----------------------------------------|----------------|---------------|-------------------------------------------|
| Alanine - tRNA ligase                  | TIGR00344847   |               | Alanine - tRNA ligase                     |
| Ribosomal protein L10                  | PF00466        | 100           | Ribosomal protein L10                     |
| Ribosomal protein L11                  | PF03946        | 60            | Ribosomal protein L11, N-terminal domain  |
| Ribosomal protein L11                  | PF00298        | 69            | Ribosomal protein L11, RNA binding domain |
| Ribosomal protein L13                  | PF00572        | 128           | Ribosomal protein L13                     |
| Ribosomal protein L14p/L23e            | PF00238        | 122           | Ribosomal protein L14p/L23e               |
| Ribosomal protein L16p/L10e            | PF00252        | 133           | Ribosomal protein L16p/L10e               |
| Ribosomal protein L18p/L5e             | PF00861        | 119           | Ribosomal protein L18p/L5e                |
| Ribosomal protein L1p/L10e             | PF00687        | 220           | Ribosomal protein L1p/L10e                |
| Ribosomal protein L22p/L17e            | PF00237        | 105           | Ribosomal protein L22p/L17e               |
| Ribosomal protein L23                  | PF00276        | 92            | Ribosomal protein L23                     |
| Ribosomal protein L29                  | PF00831        | 58            | Ribosomal protein L29                     |
| Ribosomal protein L3                   | PF00297        | 263           | Ribosomal protein L3                      |
| Ribosomal protein L4/L1                | PF00573        | 192           | Ribosomal protein L4/L1                   |
| Ribosomal protein L5                   | PF00281        | 56            | Ribosomal protein L5                      |
| Ribosomal protein L5                   | PF00673        | 95            | Ribosomal protein L5P, C-terminus         |
| Ribosomal protein S11                  | PF00411        | 110           | Ribosomal protein S11                     |
| Ribosomal protein S12/S23              | PF00164        | 122           | Ribosomal protein S12/S23                 |
| Ribosomal protein S15                  | PF00312        | 83            | Ribosomal protein S15                     |
| Ribosomal protein S17                  | PF00366        | 69            | Ribosomal protein S17                     |
| Ribosomal protein S19                  | PF00203        | 81            | Ribosomal protein S19                     |
| Ribosomal protein S2                   | PF00318        | 211           | Ribosomal protein S2                      |
| Ribosomal protein S3                   | PF00189        | 85            | Ribosomal protein S3, C-terminal domain   |
| Ribosomal protein S5                   | PF03719        | 74            | Ribosomal protein S5, C-terminal domain   |
| Ribosomal protein S5                   | PF00333        | 67            | Ribosomal protein S5, N-terminal domain   |
| Ribosomal protein S7p/S5e              | PF00177        | 148           | Ribosomal protein S7p/S5e                 |
| Ribosomal protein S8                   | PF00410        | 129           | Ribosomal protein S8                      |
| Ribosomal protein S9/S16               | PF00380        | 121           | Ribosomal protein S9/S16                  |
| Ribosomal Protein L2                   | PF03947        | 130           | Ribosomal Proteins L2, C-terminal domain  |
| Ribosomal protein L2                   | PF00181        | 77            | Ribosomal proteins L2, RNA binding domain |
| RNA polymerase beta subunit            | PF04563        | 203           | RNA polymerase beta subunit               |
| RNA polymerase Rpb1                    | PF04997        | 337           | RNA polymerase Rpb1, domain 1             |
| RNA polymerase Rpb1                    | PF00623        | 166           | RNA polymerase Rpb1, domain 2             |
| RNA polymerase Rpb1                    | PF05000        | 108           | RNA polymerase Rpb1, domain 4             |
| RNA polymerase Rpb2                    | PF04561        | 190           | RNA polymerase Rpb2, domain 2             |
| RNA polymerase Rpb2                    | PF04565        | 68            | RNA polymerase Rpb2, domain 3             |
| RNA polymerase Rpb2                    | PF00562        | 386           | RNA polymerase Rpb2, domain 6             |
| RNA polymerase Rpb2                    | PF04560        | 82            | RNA polymerase Rpb2, domain 7             |
| RNA polymerase Rpb6                    | PF01192        | 57            | RNA polymerase Rpb6                       |
| Signal peptide binding domain          | PF02978        | 104           | Signal peptide binding domain             |
| Translation-initiation factor 2        | PF11987        | 109           | Translation-initiation factor 2           |
| TruB family pseudouridylylate synthase | PF01509        | 149           | TruB family pseudouridylylate synthase    |
| Valine - tRNA ligase                   | TIGR00422863   |               | Valine - tRNA ligase                      |

**Table S3. Genes not present in “Ca. N. islandicus”, but previously present in the “Thaumarchaeota-core” as defined by<sup>27</sup>**

| <b>Locus tag of “core” gene in Ca. N. devanattera</b> | <b>Annotation</b>                                                                           |
|-------------------------------------------------------|---------------------------------------------------------------------------------------------|
| NDEV_v3_0007 ID:23877774                              | DNA polymerase II large subunit                                                             |
| NDEV_v3_0191 ID:23877958                              | Protein pelota homolog                                                                      |
| NDEV_v3_0273 ID:23878040                              | SAM-dependent methyltransferase                                                             |
| NDEV_v3_0276 ID:23878043                              | 5-carboxymethyl-2-hydroxyruconate Delta-isomerase                                           |
| NDEV_v3_0416 ID:23878183                              | methionine sulfoxide reductase B                                                            |
| NDEV_v3_0872 ID:23878639                              | UvrABC system protein C                                                                     |
| NDEV_v3_0873 ID:23878640                              | ATPase and DNA damage recognition protein of nucleotide excision repair excinuclease UvrABC |
| NDEV_v3_0874 ID:23878641                              | excinuclease of nucleotide excision repair, DNA damage recognition component                |
| NDEV_v3_0889 ID:23878656                              | Iron-containing alcohol dehydrogenase                                                       |
| NDEV_v3_0897 ID:23878664                              | Endoribonuclease L-PSP                                                                      |
| NDEV_v3_0915 ID:23878682                              | Double-stranded beta-helix fold enzyme                                                      |
| NDEV_v3_0916 ID:23878683                              | putative methyltransferase type 11                                                          |
| NDEV_v3_0925 ID:23878692                              | Transcriptional regulator, ArsR family                                                      |
| NDEV_v3_0952 ID:23878719                              | Disulfide Bond oxidoreductase D family protein                                              |
| NDEV_v3_1056 ID:23878823                              | Rossmann fold nucleotide-binding protein                                                    |
| NDEV_v3_1068 ID:23878835                              | CMP/dCMP deaminase zinc-binding                                                             |
| NDEV_v3_1143 ID:23878910                              | Oligoendopeptidase, PepF/M3 family                                                          |
| NDEV_v3_1165 ID:23878932                              | Pyruvoyl-dependent arginine decarboxylase                                                   |
| NDEV_v3_1181 ID:23878948                              | putative SMC domain protein                                                                 |
| NDEV_v3_1198 ID:23878965                              | Elongation factor Tu domain 2 protein                                                       |
| NDEV_v3_1303 ID:23879070                              | Peptide methionine sulfoxide reductase MsrA                                                 |
| NDEV_v3_1775 ID:23879542                              | Modification methylase LlaDCHIA                                                             |
| NDEV_v3_1856 ID:23879623                              | putative bacterial transferase hexapeptide (Three repeats)                                  |
| NDEV_v3_1858 ID:23879625                              | Glycosyl transferase family protein                                                         |
| NDEV_v3_2071 ID:23879838                              | Peptidyl-prolyl cis-trans isomerase                                                         |
| NDEV_v3_2075 ID:23879842                              | PfkB domain protein                                                                         |
| NDEV_v3_2078 ID:23879845                              | Putative pyridoxal phosphate-dependent aminotransferase                                     |
| NDEV_v3_2106 ID:23879873                              | DNA-directed DNA polymerase                                                                 |
| NDEV_v3_0018 ID:23877785                              | conserved protein of unknown function                                                       |
| NDEV_v3_0103 ID:23877870                              | Uncharacterized membrane protein required for N-linked glycosylation (Modular protein)      |
| NDEV_v3_0319 ID:23878086                              | conserved protein of unknown function                                                       |
| NDEV_v3_0351 ID:23878118                              | Membrane protein-like protein                                                               |
| NDEV_v3_0419 ID:23878186                              | conserved protein of unknown function                                                       |
| NDEV_v3_0557 ID:23878324                              | conserved protein of unknown function                                                       |
| NDEV_v3_0732 ID:23878499                              | conserved protein of unknown function                                                       |
| NDEV_v3_0831 ID:23878598                              | conserved protein of unknown function                                                       |
| NDEV_v3_0848 ID:23878615                              | conserved protein of unknown function                                                       |
| NDEV_v3_1197 ID:23878964                              | conserved protein of unknown function                                                       |
| NDEV_v3_1246 ID:23879013                              | conserved membrane protein of unknown function                                              |
| NDEV_v3_1619 ID:23879386                              | protein of unknown function                                                                 |
| NDEV_v3_1649 ID:23879416                              | protein of unknown function                                                                 |
| NDEV_v3_1654 ID:23879421                              | conserved protein of unknown function                                                       |
| NDEV_v3_1755 ID:23879522                              | protein of unknown function                                                                 |
| NDEV_v3_1759 ID:23879526                              | conserved protein of unknown function                                                       |
| NDEV_v3_1776 ID:23879543                              | protein of unknown function                                                                 |
| NDEV_v3_1831 ID:23879598                              | protein of unknown function                                                                 |
| NDEV_v3_1852 ID:23879619                              | conserved protein of unknown function                                                       |
| NDEV_v3_1910 ID:23879677                              | Conserved protein of unknown function                                                       |
| NDEV_v3_1936 ID:23879703                              | conserved exported protein of unknown function                                              |
| NDEV_v3_2039 ID:23879806                              | protein of unknown function                                                                 |
| NDEV_v3_0100 ID:23877867                              | Putative nucleic acid binding protein                                                       |
| NDEV_v3_0101 ID:23877868                              | Putative nucleic acid binding protein                                                       |
| NDEV_v3_0267 ID:23878034                              | protein of unknown function                                                                 |
| NDEV_v3_0428 ID:23878195                              | exported protein of unknown function                                                        |
| NDEV_v3_0951 ID:23878718                              | Redoxin domain protein                                                                      |
| NDEV_v3_1248 ID:23879015                              | Methyltransferase type 11                                                                   |
| NDEV_v3_1377 ID:23879144                              | conserved membrane protein of unknown function                                              |
| NDEV_v3_1561 ID:23879328                              | conserved protein of unknown function                                                       |
| NDEV_v3_1613 ID:23879380                              | Methionine synthase                                                                         |
| NDEV_v3_1614 ID:23879381                              | Homocysteine S-methyltransferase                                                            |
| NDEV_v3_1985 ID:23879752                              | DNA topoisomerase type IA zn finger domain protein                                          |
| NDEV_v3_0126 ID:23877893                              | ABC transporter, permease component                                                         |
| NDEV_v3_1837 ID:23879604                              | conserved protein of unknown function                                                       |
| NDEV_v3_0184 ID:23877951                              | DEAD/DEAH box helicase domain protein                                                       |
| NDEV_v3_0023 ID:23877790                              | CCA-adding enzyme                                                                           |
| NDEV_v3_0924 ID:23878691                              | Phosphoribosylaminoimidazole-succinocarboxamide synthase                                    |
| NDEV_v3_0004 ID:23877771                              | conserved protein of unknown function                                                       |
| NDEV_v3_0522 ID:23878289                              | Molecular chaperone                                                                         |
| NDEV_v3_1051 ID:23878818                              | conserved protein of unknown function                                                       |
| NDEV_v3_0413 ID:23878180                              | 4Fe-4S ferredoxin iron-sulfur binding domain protein                                        |
| NDEV_v3_1807 ID:23879574                              | conserved protein of unknown function                                                       |
| NDEV_v3_0792 ID:23878559                              | RNA polymerase Rpb6                                                                         |
| NDEV_v3_0699 ID:23878466                              | Uncharacterized Zn-finger containing protein                                                |
| NDEV_v3_1725 ID:23879492                              | ThiamineS protein                                                                           |

**Table S4.** Genome locus tags and annotations of genes discussed in the main text.

| Gene                                                                                                                      | Product                                                                       | Locus tag      |
|---------------------------------------------------------------------------------------------------------------------------|-------------------------------------------------------------------------------|----------------|
| <b>3-hydroxypropionate-4-hydroxybutyrate pathway</b>                                                                      |                                                                               |                |
| accB/pccB                                                                                                                 | Acetyl-CoA/ propionyl-CoA carboxylase, carboxyltransferase subunit            | AOA3F1_v2_0346 |
| accC/pccC                                                                                                                 | acetyl-CoA carboxylase, biotin carboxylase subunit                            | AOA3F1_v2_0345 |
| accA/pccA                                                                                                                 | biotin carboxyl carrier protein of put. acetyl-CoA/ propionyl-CoA carboxylase | AOA3F1_v2_0344 |
|                                                                                                                           | putative methylmalonyl-CoA epimerase                                          | AOA3F1_v2_0551 |
|                                                                                                                           | methylmalonyl-CoA mutase, large subunit                                       | AOA3F1_v2_0552 |
|                                                                                                                           | methylmalonyl-CoA mutase, small subunit, C-terminus                           | AOA3F1_v2_1302 |
|                                                                                                                           | 4-hydroxybutyryl-CoA dehydratase                                              | AOA3F1_v2_0024 |
|                                                                                                                           | 4-hydroxybutyryl-CoA dehydratase                                              | AOA3F1_v2_0025 |
|                                                                                                                           | 3-hydroxybutyryl-CoA dehydratase                                              | AOA3F1_v2_0462 |
|                                                                                                                           | (S)-3-hydroxybutyryl-CoA dehydrogenase (NAD <sup>+</sup> )                    |                |
|                                                                                                                           | Acetoacetyl-CoA thiolase or ketoacyl-CoA thiolase                             |                |
| <b>Candidate genes for 3-hydroxypropionate-4-hydroxybutyrate carbon fixation pathway including alcohol dehydrogenases</b> |                                                                               |                |
| asd                                                                                                                       | aspartate-semialdehyde dehydrogenase                                          | AOA3F1_v2_0008 |
|                                                                                                                           | 3-hydroxyacyl-CoA dehydrogenase                                               | AOA3F1_v2_1520 |
| acs                                                                                                                       | Acetyl-coenzyme A synthetase                                                  | AOA3F1_v2_0573 |
| acsA-1                                                                                                                    | Acetyl-coenzyme A synthetase                                                  | AOA3F1_v2_0981 |
| acsA-2                                                                                                                    | Acetyl-coenzyme A synthetase                                                  | AOA3F1_v2_1057 |
| gabD                                                                                                                      | succinate-semialdehyde dehydrogenase                                          | AOA3F1_v2_0424 |
|                                                                                                                           | Succinate-semialdehyde dehydrogenase (acetylating)                            | AOA3F1_v2_0975 |
|                                                                                                                           | acetoacetyl-CoA thiolase or ketoacyl-CoA thiolase                             | AOA3F1_v2_0535 |
|                                                                                                                           | acetoacetyl-CoA thiolase                                                      | AOA3F1_v2_0064 |
|                                                                                                                           | putative CoA-binding protein                                                  | AOA3F1_v2_0829 |
|                                                                                                                           | Protein with CoA-binding domain                                               | AOA3F1_v2_0830 |
| <b>Tricarboxylic acid cycle</b>                                                                                           |                                                                               |                |
| gltA                                                                                                                      | citrate synthase                                                              | AOA3F1_v2_0976 |
| acnA                                                                                                                      | aconitate hydratase                                                           | AOA3F1_v2_0442 |
|                                                                                                                           | putative isocitrate/isopropylmalate dehydrogenase                             | AOA3F1_v2_1453 |
| (o)orAC                                                                                                                   | 2:oxoacid-ferredoxin oxidoreductase, fused alpha and gamma subunit            | AOA3F1_v2_1720 |
| (o)orB                                                                                                                    | 2:oxoacid-ferredoxin oxidoreductase, beta subunit                             | AOA3F1_v2_1719 |
| sucD                                                                                                                      | succinyl-CoA ligase, subunit alpha                                            | AOA3F1_v2_1193 |
| sucC                                                                                                                      | succinyl-CoA ligase, subunit beta                                             | AOA3F1_v2_1192 |
| sdhA                                                                                                                      | succinate dehydrogenase flavoprotein subunit/fumarate reductase               | AOA3F1_v2_1407 |
| (sdhC)                                                                                                                    | putative succinate dehydrogenase/fumarate reductase                           | AOA3F1_v2_1406 |
| (sdhD)                                                                                                                    | putative succinate dehydrogenase/fumarate reductase                           | AOA3F1_v2_1405 |
| sdhB                                                                                                                      | FeS-center protein of succinate dehydrogenase/fumarate reductase              | AOA3F1_v2_1404 |
| fumC                                                                                                                      | fumarate hydratase                                                            | AOA3F1_v2_0771 |
| mdh                                                                                                                       | malate dehydrogenase                                                          | AOA3F1_v2_0339 |
| ytsJ                                                                                                                      | NAD(P)-dependent malic enzyme                                                 | AOA3F1_v2_1553 |
| <b>Gluconeogenesis</b>                                                                                                    |                                                                               |                |
| pckA                                                                                                                      | ATP-dependent phosphoenolpyruvate carboxykinase                               | AOA3F1_v2_0396 |
| ppdk                                                                                                                      | pyruvate, phosphate dikinase                                                  | AOA3F1_v2_1141 |
| eno                                                                                                                       | enolase                                                                       | AOA3F1_v2_0437 |
| apgM                                                                                                                      | 2,3-bisphosphoglycerate-independent phosphoglycerate mutase                   | AOA3F1_v2_0723 |
| (gpmB)                                                                                                                    | putative 2,3-bisphosphoglycerate-dependent phosphoglycerate mutase            | AOA3F1_v2_0364 |
| pgk                                                                                                                       | phosphoglycerate kinase                                                       | AOA3F1_v2_1746 |
| (gap)                                                                                                                     | putative glyceraldehyde-3-phosphate dehydrogenase, phosphorylating            | AOA3F1_v2_0467 |
| tpiA                                                                                                                      | triosephosphate isomerase                                                     | AOA3F1_v2_1135 |
| fbp                                                                                                                       | Inositol-1-monophosphatase/ bifunctional fructose-1,6-bisphosphatase          | AOA3F1_v2_1480 |
| <b>11 subunit version of Complex I: type I NADH dehydrogenase (nuoEFG absent)</b>                                         |                                                                               |                |
| nuoA                                                                                                                      | NADH-quinone oxidoreductase, subunit A                                        | AOA3F1_v2_1711 |
| nuoB                                                                                                                      | NADH-quinone oxidoreductase, subunit B                                        | AOA3F1_v2_1710 |
| nuoC                                                                                                                      | NADH-quinone oxidoreductase, subunit C                                        | AOA3F1_v2_1709 |
| nuoD                                                                                                                      | NADH-quinone oxidoreductase, subunit D                                        | AOA3F1_v2_1708 |
| nuoH                                                                                                                      | NADH-quinone oxidoreductase, subunit H                                        | AOA3F1_v2_1707 |
| nuoI                                                                                                                      | NADH-quinone oxidoreductase, subunit I                                        | AOA3F1_v2_1706 |
| nuoJ                                                                                                                      | NADH-quinone oxidoreductase, subunit J                                        | AOA3F1_v2_1705 |
| nuoK                                                                                                                      | NADH-quinone oxidoreductase, subunit K                                        | AOA3F1_v2_1703 |
| nuoM                                                                                                                      | NADH-quinone oxidoreductase, subunit M                                        | AOA3F1_v2_1702 |
| nuoL                                                                                                                      | NADH-quinone oxidoreductase, subunit L                                        | AOA3F1_v2_1701 |
| nuoN                                                                                                                      | NADH-quinone oxidoreductase, subunit N                                        | AOA3F1_v2_1699 |



**Table S4 continued**

alternative NADH dehydrogenases, type-II NADH dehydrogenase, Coenzyme F420 dependent NADP dehydrogenase, nitroreductases, NADH-dependent FMN reductases, FAD dependent oxidoreductases

|                                          |                                                                           |                |
|------------------------------------------|---------------------------------------------------------------------------|----------------|
|                                          | putative FAD-dependent pyridine nucleotide-disulphide oxidoreductase      | AOA3F1_v2_0069 |
|                                          | putative NADH dehydrogenase/NAD(P)H nitroreductase AF_0226                | AOA3F1_v2_1059 |
|                                          | FAD/NAD(P)-binding oxidoreductase                                         | AOA3F1_v2_1072 |
|                                          | Geranylgeranyl reductase family protein                                   | AOA3F1_v2_1423 |
| <b>Complex II</b>                        |                                                                           |                |
| sdhA                                     | succinate dehydrogenase flavoprotein subunit/fumarate reductase           | AOA3F1_v2_1407 |
| (sdhC)                                   | putative succinate dehydrogenase/fumarate reductase                       | AOA3F1_v2_1406 |
| (sdhD)                                   | putative succinate dehydrogenase/fumarate reductase                       | AOA3F1_v2_1405 |
| sdhB                                     | FeS-center protein of succinate dehydrogenase/fumarate reductase          | AOA3F1_v2_1404 |
| <b>Complex III: 1.10.2.2</b>             |                                                                           |                |
| petB                                     | cytochrome b/b6 domain                                                    | AOA3F1_v2_1784 |
|                                          | Rieske iron sulfur protein                                                | AOA3F1_v2_1785 |
|                                          | putative Rieske (2Fe-2S) domain protein                                   | AOA3F1_v2_1749 |
| <b>Complex IV</b>                        |                                                                           |                |
|                                          | conserved hypothetical protein                                            | AOA3F1_v2_0365 |
| (coxB)                                   | putative heme-copper oxidase subunit II                                   | AOA3F1_v2_0366 |
| coxA                                     | Cytochrome c oxidase polypeptide 1                                        | AOA3F1_v2_0367 |
|                                          | blue (type 1) copper domain protein                                       | AOA3F1_v2_0368 |
|                                          | putative Blue (Type 1) copper domain protein                              | AOA3F1_v2_0302 |
|                                          | putative cytochrome oxidase assembly protein                              | AOA3F1_v2_0369 |
| <b>Complex V: A1A0-type ATPase</b>       |                                                                           |                |
| atpE                                     | archaeal A1A0-type ATP synthase, subunit E                                | AOA3F1_v2_0087 |
| atpA                                     | archaeal A1A0-type ATP synthase, subunit A                                | AOA3F1_v2_0086 |
| atpB                                     | archaeal A1A0-type ATP synthase, subunit B                                | AOA3F1_v2_0085 |
| atpD                                     | archaeal A1A0-type ATP synthase, subunit D                                | AOA3F1_v2_0084 |
| atpK                                     | archaeal A1A0-type ATP synthase, subunit K                                | AOA3F1_v2_0082 |
| atpI                                     | archaeal A1A0-type ATP synthase, subunit I                                | AOA3F1_v2_0081 |
| atpC                                     | archaeal A1A0-type ATP synthase, subunit C                                | AOA3F1_v2_0080 |
| atpF                                     | archaeal A1A0-type ATP synthase, subunit F                                | AOA3F1_v2_0836 |
| <b>Electron carriers, plastocyanines</b> |                                                                           |                |
|                                          | blue (type 1) copper domain protein                                       | AOA3F1_v2_0368 |
|                                          | blue (type 1) copper domain protein                                       | AOA3F1_v2_1174 |
|                                          | blue (type 1) copper domain protein                                       | AOA3F1_v2_0302 |
|                                          | putative blue (type 1) copper domain protein                              | AOA3F1_v2_0302 |
|                                          | putative blue (type 1) copper domain protein                              | AOA3F1_v2_1780 |
|                                          | putative blue (type 1) copper domain protein (fragment)                   | AOA3F1_v2_1088 |
| <b>Multicopper oxygenases</b>            |                                                                           |                |
|                                          | multicopper oxidase type 3 (MCO1)                                         | AOA3F1_v2_1374 |
| <b>Ammonia-monooxygenase</b>             |                                                                           |                |
| amoB                                     | putative archaeal ammonia monooxygenase subunit B                         | AOA3F1_v2_1440 |
| amoC                                     | Ammonia monooxygenase/methane monooxygenase, subunit C                    | AOA3F1_v2_1439 |
| amoX                                     | conserved hypothetical protein                                            | AOA3F1_v2_1438 |
| amoA                                     | putative archaeal ammonia monooxygenase subunit A                         | AOA3F1_v2_1437 |
| <b>Urease</b>                            |                                                                           |                |
| ureD                                     | Urease accessory protein UreD                                             | AOA3F1_v2_0945 |
| ureG                                     | Urease accessory protein UreG                                             | AOA3F1_v2_0944 |
| ureF                                     | Urease accessory protein UreF                                             | AOA3F1_v2_0943 |
| ureE                                     | Urease accessory protein UreE                                             | AOA3F1_v2_0942 |
| ureC                                     | Urease subunit alpha                                                      | AOA3F1_v2_0939 |
| ureB                                     | Urease subunit beta                                                       | AOA3F1_v2_0938 |
| ureA                                     | Urease gamma subunit                                                      | AOA3F1_v2_0937 |
| <b>Nitrilase/cyanide hydratase</b>       |                                                                           |                |
|                                          | putative Nitrilase/cyanide hydratase and apolipoprotein N-acyltransferase | AOA3F1_v2_0558 |
| <b>Detoxification</b>                    |                                                                           |                |
| (cld)                                    | putative chlorite dismutase                                               | AOA3F1_v2_1762 |
| sod                                      | Superoxide dismutase [Fe]                                                 | AOA3F1_v2_0392 |

**Table S4 continued****Flagellum and Chemotaxis**

|        |                                                      |                |
|--------|------------------------------------------------------|----------------|
| (flaK) | putative archaeal preflagellin peptidase FlaK        | AOA3F1_v2_0613 |
| flaB   | archaeal flagellin                                   | AOA3F1_v2_0578 |
|        | hypothetical protein                                 | AOA3F1_v2_0579 |
| flaG   | flagellar protein FlaG                               | AOA3F1_v2_0580 |
| flaF   | flagellar protein FlaF                               | AOA3F1_v2_0581 |
| flaH   | flagella protein FlaH                                | AOA3F1_v2_0582 |
| (flaJ) | putative flagella assembly protein FlaJ              | AOA3F1_v2_0583 |
| flaI   | archaeal flagella protein FlaI                       | AOA3F1_v2_0584 |
| (cheR) | putative chemotaxis MCP methyltransferase CheR       | AOA3F1_v2_0585 |
| cheD   | chemoreceptor glutamine deamidase CheD               | AOA3F1_v2_0586 |
| (cheC) | putative chemotaxis protein CheC                     | AOA3F1_v2_0587 |
| cheA   | chemotactic sensor histidine kinase CheA             | AOA3F1_v2_0594 |
| cheB   | chemotaxis response regulator methyltransferase CheB | AOA3F1_v2_0593 |
| cheY   | chemotaxis response regulator CheY                   | AOA3F1_v2_0592 |
| cheW   | chemotaxis protein CheW                              | AOA3F1_v2_0591 |
| (MCP)  | putative methyl-accepting chemotaxis protein         | AOA3F1_v2_0590 |
| (MCP)  | putative methyl-accepting chemotaxis protein         | AOA3F1_v2_0589 |
|        | putative HEAT repeat-containing PBS lyase            | AOA3F1_v2_0153 |

**S assimilation**

|        |                                                    |                |
|--------|----------------------------------------------------|----------------|
| (cysA) | putative thiosulfate sulfurtransferase             | AOA3F1_v2_1414 |
| sat    | Sulfate adenylyltransferase                        | AOA3F1_v2_0054 |
| (cysC) | putative adenylyl-sulfate kinase                   | AOA3F1_v2_1343 |
| cysH   | Thioredoxin-dependent 5'-adenylylsulfate reductase | AOA3F1_v2_0053 |
| sir    | Ferredoxin-sulfite/nitrite reductase               | AOA3F1_v2_0949 |
|        | Rhodenase-Sulfurtransferase                        | AOA3F1_v2_0950 |

**Amino acid fermentation**

|        |                                                         |                |
|--------|---------------------------------------------------------|----------------|
| ilvE   | putative branched-chain-amino-acid aminotransferase     | AOA3F1_v2_1069 |
| ilvE-2 | putative branched-chain-amino-acid aminotransferase     | AOA3F1_v2_1492 |
| aspC   | Aspartate/ tyrosine/ aromatic aminotransferase          | AOA3F1_v2_1546 |
| gdhA   | Glutamate dehydrogenase                                 | AOA3F1_v2_0468 |
| iorB   | Indolepyruvate oxidoreductase, beta subunit             | AOA3F1_v2_1273 |
| iorA   | Indolepyruvate ferredoxin oxidoreductase, alpha subunit | AOA3F1_v2_1272 |
| acs    | Acetyl-coenzyme A synthetase                            | AOA3F1_v2_0573 |
| acsA   | Acetyl-coenzyme A synthetase                            | AOA3F1_v2_0981 |
| acsA   | Acetyl-coenzyme A synthetase                            | AOA3F1_v2_1057 |
|        | Acyl-CoA synthetase (NDP forming)                       | AOA3F1_v2_1415 |
| sir    | Ferredoxin-sulfite/nitrite reductase                    | AOA3F1_v2_0949 |
| korB   | 2-oxoglutarate synthase subunit beta                    | AOA3F1_v2_1719 |
| korA   | 2-oxoglutarate synthase subunit alpha                   | AOA3F1_v2_1720 |

**Hydrogenase**

|             |                                                                           |                |
|-------------|---------------------------------------------------------------------------|----------------|
| (hypA)      | putative Hydrogenase nickel incorporation protein HypA                    | AOA3F1_v2_1388 |
|             | putative Hydrogenase 2 maturation protease                                | AOA3F1_v2_1387 |
| (hydA)      | Nickel-dependent hydrogenase alpha subunit                                | AOA3F1_v2_1386 |
| (hydD)      | putative Nickel-dependent hydrogenase delta subunit                       | AOA3F1_v2_1385 |
| (hydG)      | putative Nickel-dependent hydrogenase gamma subunit                       | AOA3F1_v2_1384 |
|             | putative Cyclic nucleotide-binding protein, hydrogenase accessory protein | AOA3F1_v2_1383 |
| (hydB)      | putative Nickel-dependent hydrogenase beta subunit                        | AOA3F1_v2_1382 |
| hypF        | putative carbamoyltransferase HypF                                        | AOA3F1_v2_1380 |
| (hypC/hupF) | putative Hydrogenase assembly chaperone HypC/HupF                         | AOA3F1_v2_1255 |

**DNA replication and repair**

|      |                                         |                |
|------|-----------------------------------------|----------------|
| dbh2 | DNA polymerase IV                       | AOA3F1_v2_0742 |
| dpo  | DNA polymerase B1                       | AOA3F1_v2_0645 |
|      | putative primase / polymerase           | AOA3F1_v2_0930 |
| priB | DNA primase large subunit PriL          | AOA3F1_v2_0032 |
| priA | putative DNA primase small subunit PriS | AOA3F1_v2_0030 |
| dnaG | DNA primase DnaG                        | AOA3F1_v2_0952 |

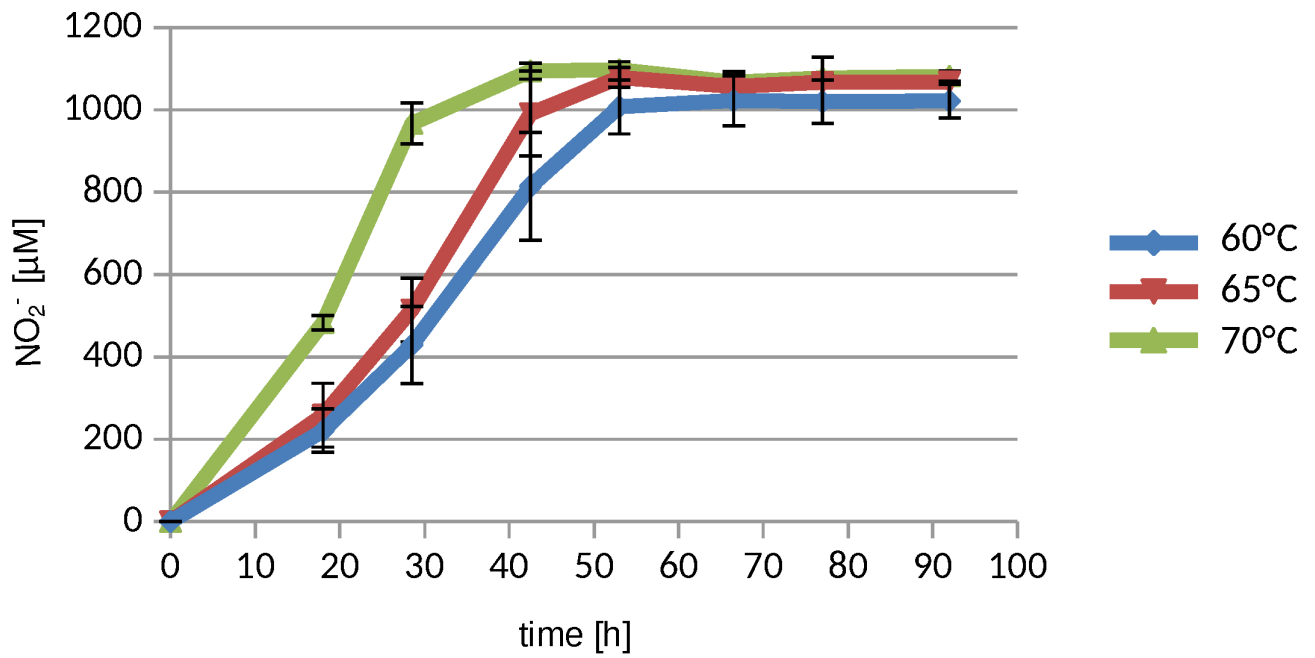

**Figure S1.** Nitrite accumulation through oxidation of ammonia at three different temperatures. Data points show means, error bars show standard errors of n = 3 biological replicates.

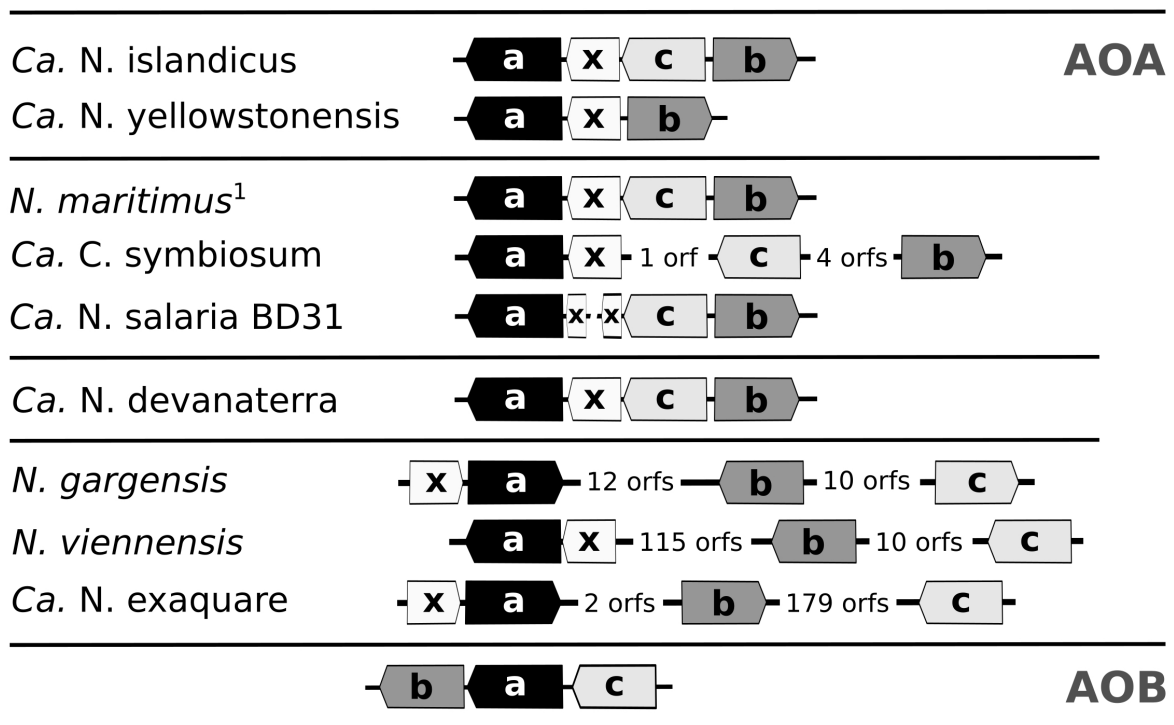

**Figure S2.** Gene order and orientation of the ammonia monooxygenase subunits (*amoA*, *amoB*, *amoC*, and the putative “*amoX*”) in “*Ca. N. islandicus*” and other Thaumarchaeota. The gene order of ammonia-oxidizing bacteria (AOB) is given on the bottom as a reference. <sup>1</sup> also represents the gene arrangement in “*Ca. N. limnia*”, “*Ca. N. korensis*” and “*Ca. N. uzonensis*”. The figure is a modified version of the figure 26.3 in (28)

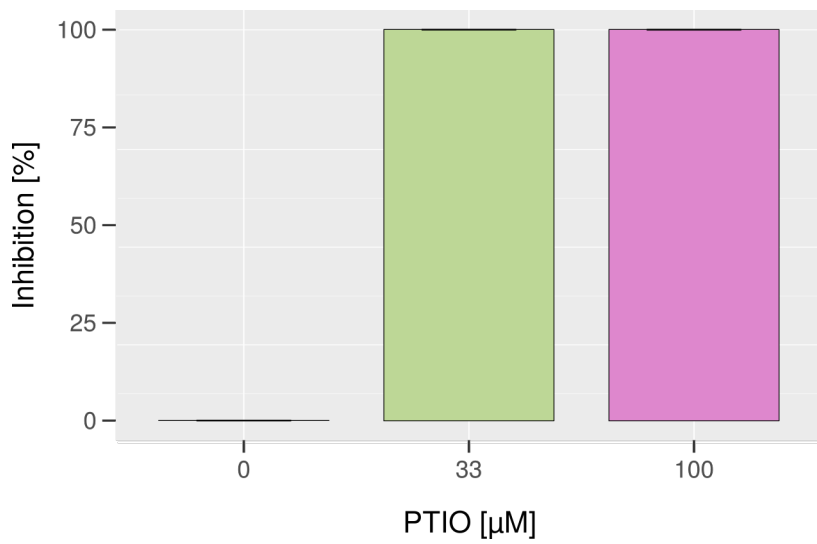

**Figure S3.** Inhibition of ammonia oxidation by “*Ca. N. islandicus*” caused by different concentrations of the NO-scavenger 2-phenyl-4,4,5,5-tetramethylimidazoline-1-oxyl 3-oxide (PTIO). Error bars show the standard error of two replicates.

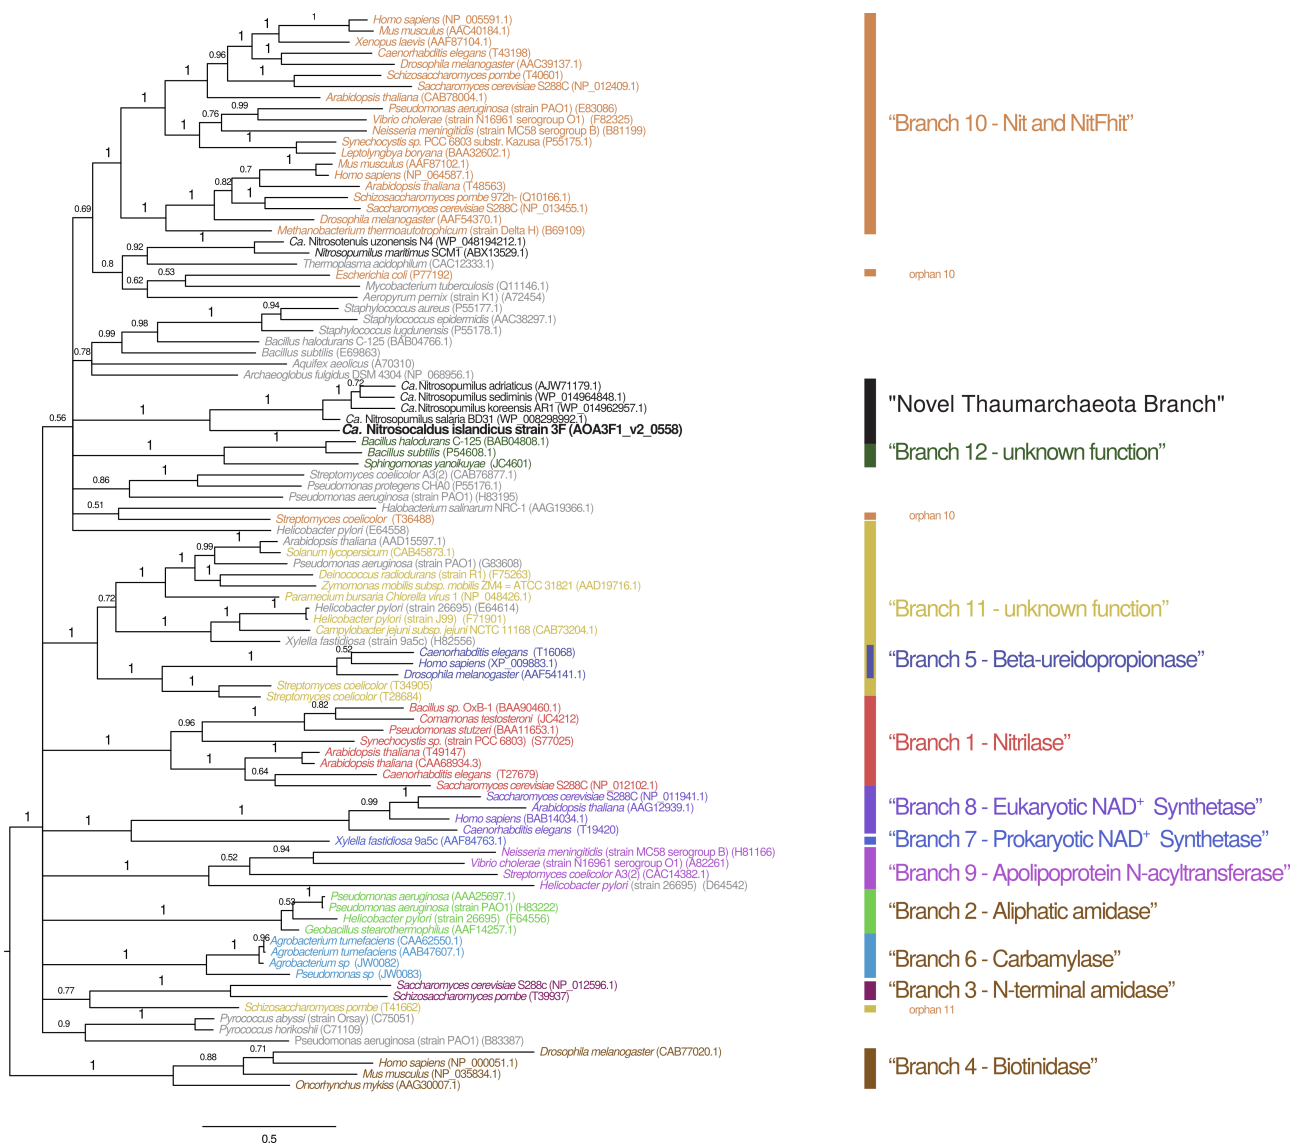

**Figure S4.** Phylogenetic tree of nitrilase superfamily members showing relative placement of “*Ca. Nitrosocaldus islandicus* strain 3F” in a novel branch consisting of Thaumarchaeota (Novel Thaumarchaeota branch). Sequences and branch labels are from (29). Grey labels indicate “nonfused outliers” as indicated by (29) which were not assigned to any of the 12 named branches. Black labels indicate sequences obtained from the thaumarchaeotal genomes. Sequences assigned to branches 10 and 11 in (29) that do not clade with other members of those branches in this phylogenetic tree are labelled “orphan”.

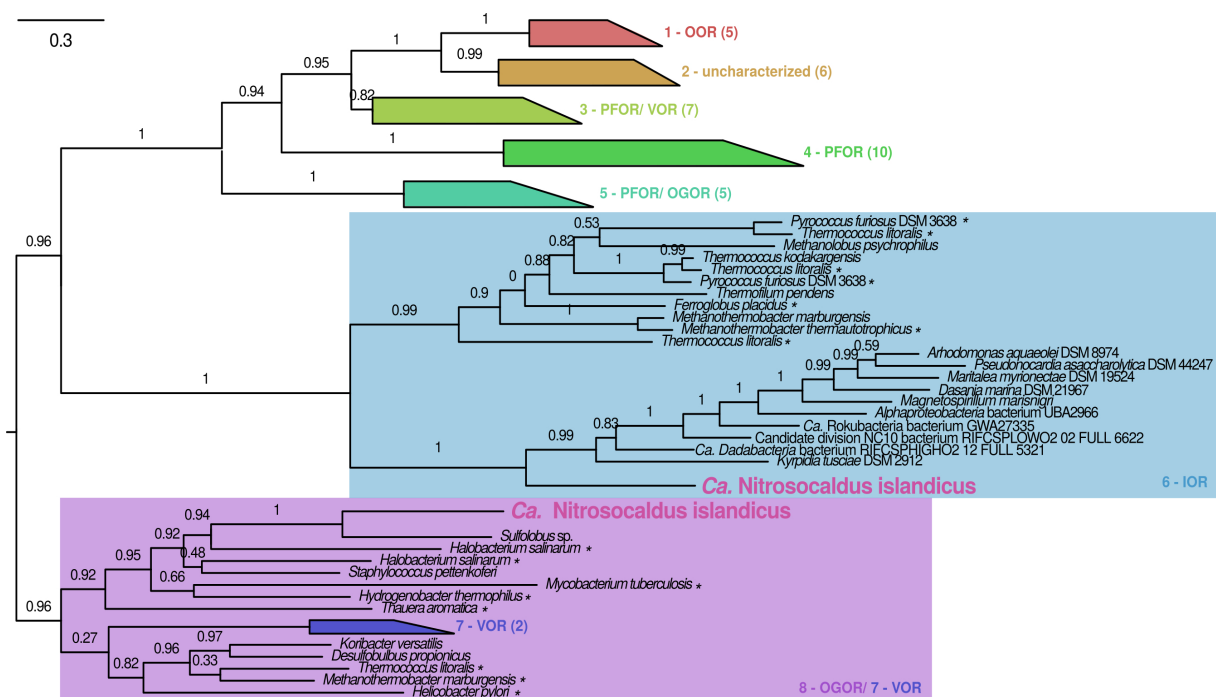

**Fig. S5.** Unrooted phylogenetic tree of 2-oxoacid oxidoreductases (OFORs) showing placement of the two OFORs present in “*Ca. Nitrosocaldus islandicus* strain 3F”. Clade labels and most sequences are from (30). Numbers in brackets show the number of sequences in collapsed clades. Functionally characterized enzymes are indicated with a “\*”. OOR, oxalate oxidoreductase; PFOR, pyruvate:ferredoxin oxidoreductase; VOR, 2-ketoisovalerate oxidoreductase; OGOR, 2-oxoglutarate oxidoreductase; IOR, indolepyruvate oxidoreductase.

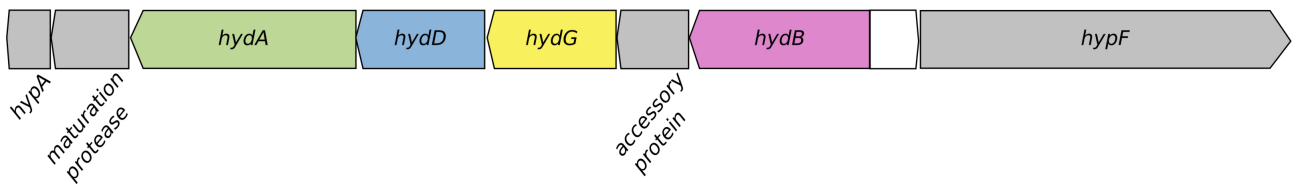

**Figure S6.** Schematic illustration of the genomic locus in “*Ca. Nitrosocaldus islandicus*” that encodes a bidirectional, NADP(H)-coupled type 3b [NiFe] hydrogenase. The locus contains the genes of the hydrogenase subunits *hydADGB* and of accessory proteins involved in enzyme maturation. Genes are drawn to scale. Locus tags (as found on MaGe) from left to right are as follows: AOA3F1\_v2\_1388, AOA3F1\_v2\_1387, AOA3F1\_v2\_1386, AOA3F1\_v2\_1385, AOA3F1\_v2\_1384, AOA3F1\_v2\_1383, AOA3F1\_v2\_1382, AOA3F1\_v2\_1381, AOA3F1\_v2\_1380.



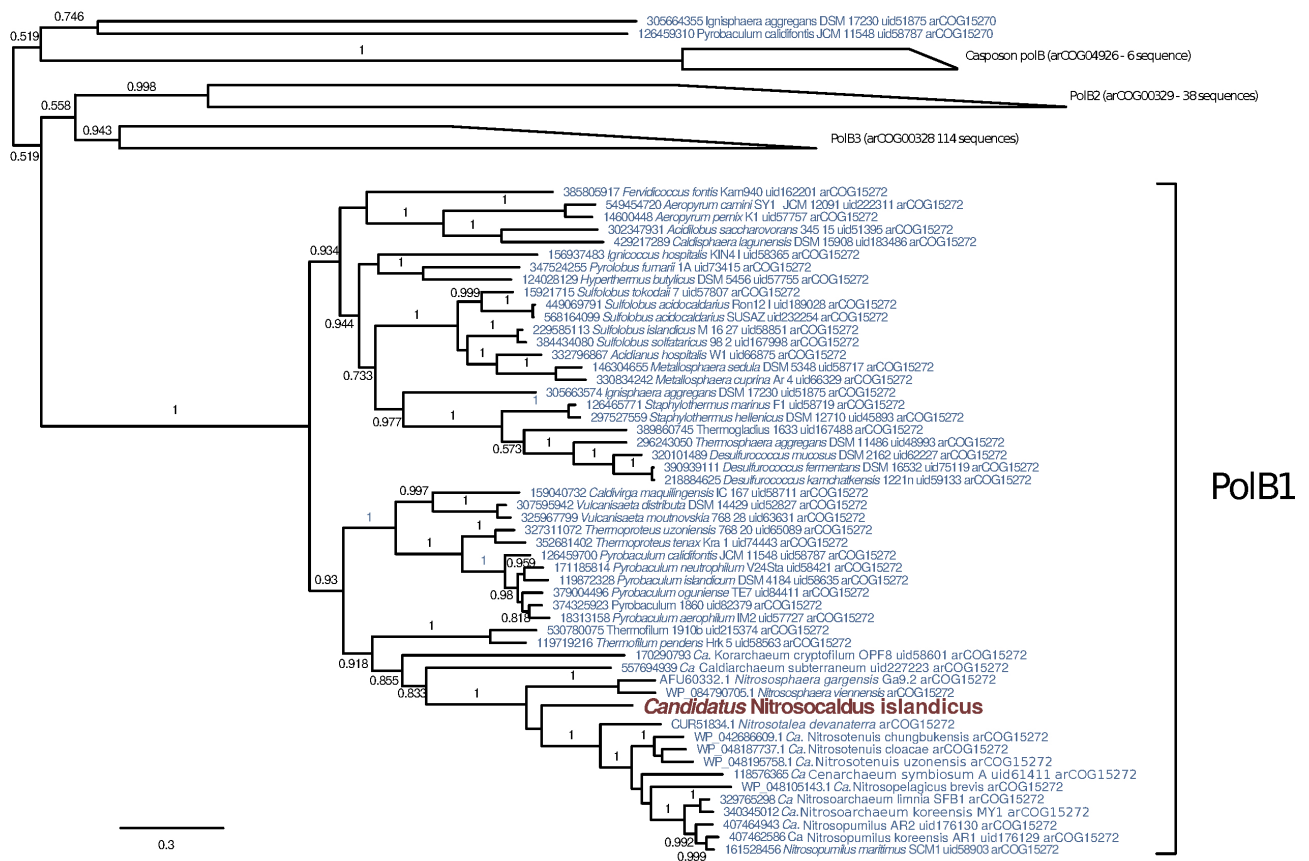

**Fig S7.** Unrooted approximate maximum likelihood tree showing placement of the PolB from “*Ca. Nitrosocaldus islandicus*” as a member of the PolB1 clade. The tree was calculated using FastTree<sup>31</sup> on 213 sequences aligned with mafft<sup>32</sup> (3058 aligned positions). Branch support greater than 0.5 is indicated on internal branches. PolB2, PolB3 and Casposon-related PolB (named according to 33) have been collapsed into right trapezoids in which the bases indicate shortest and longest terminal branches within each clade.

## References

1. Hallam, S. J. *et al.* Genomic analysis of the uncultivated marine crenarchaeote *Cenarchaeum symbiosum*. *Proc. Natl. Acad. Sci.* **103**, 18296–18301 (2006).
2. Lehtovirta-Morley, L. E. *et al.* Identifying potential mechanisms enabling acidophily in the ammonia-oxidising archaeon ‘*Candidatus Nitrosotalea devanattera*’. *Appl. Environ. Microbiol.* AEM.04031-15 (2016). doi:10.1128/AEM.04031-15
3. Blainey, P. C., Mosier, A. C., Potanina, A., Francis, C. A. & Quake, S. R. Genome of a low-salinity ammonia-oxidizing archaeon determined by single-cell and metagenomic analysis. *PLoS ONE* **6**, (2011).
4. Zhalnina, K. V. *et al.* Genome sequence of *Candidatus Nitrososphaera evergladensis* from group I.1b enriched from Everglades soil reveals novel genomic features of the ammonia-oxidizing archaea. *PLoS ONE* **9**, e101648 (2014).
5. Butterfield, C. N. *et al.* Proteogenomic analyses indicate bacterial methylotrophy and archaeal heterotrophy are prevalent below the grass root zone. *PeerJ* **4**, e2687 (2016).
6. Kamanda Ngugi, D. *et al.* Comparative genomics reveals adaptations of a halotolerant *thaumarchaeon* in the interfaces of brine pools in the Red Sea. *ISME J.* **9**, 396–411 (2015).
7. Haroon, M. F., Thompson, L. R., Parks, D. H., Hugenholtz, P. & Stingl, U. A catalogue of 136 microbial draft genomes from Red Sea metagenomes. *Sci. Data* **3**, (2016).
8. Walker, C. B. *et al.* *Nitrosopumilus maritimus* genome reveals unique mechanisms for nitrification and autotrophy in globally distributed marine crenarchaea. *Proc. Natl. Acad. Sci. U. S. A.* **107**, 8818–8823 (2010).
9. Santoro, A. E. *et al.* Genomic and proteomic characterization of “*Candidatus Nitrosopelagicus brevis*”: An ammonia-oxidizing archaeon from the open ocean. *Proc. Natl. Acad. Sci.* **112**, 1173–1178 (2015).
10. Kerou, M. *et al.* Proteomics and comparative genomics of *Nitrososphaera viennensis* reveal the core genome and adaptations of archaeal ammonia oxidizers. *Proc. Natl. Acad. Sci.* **113**, E7937–E7946 (2016).
11. Hug, L. A. *et al.* Critical biogeochemical functions in the subsurface are associated with bacteria from new phyla and little studied lineages. *Environ. Microbiol.* **18**, 159–173 (2016).

12. Ahlgren, N. A. *et al.* Genome and epigenome of a novel marine *Thaumarchaeota* strain suggest viral infection, phosphorothioation DNA modification and multiple restriction systems. *Environ. Microbiol.* n/a-n/a (2017). doi:10.1111/1462-2920.13768
13. Jung, M.-Y. *et al.* A hydrophobic ammonia-oxidizing archaeon of the *Nitrosocosmicus* clade isolated from coal tar-contaminated sediment. *Environ. Microbiol. Rep.* **8**, 983–992 (2016).
14. Mosier, A. C., Allen, E. E., Kim, M., Ferriera, S. & Francis, C. A. Genome sequence of “*Candidatus Nitrosoarchaeum limnia*” BG20, a low-salinity ammonia-oxidizing archaeon from the San Francisco Bay estuary. *J. Bacteriol.* **194**, 2119–2120 (2012).
15. Mosier, A. C., Allen, E. E., Kim, M., Ferriera, S. & Francis, C. A. Genome sequence of “*Candidatus Nitrosopumilus salaria*” BD31, an ammonia-oxidizing archaeon from the San Francisco Bay estuary. *J. Bacteriol.* **194**, 2121–2122 (2012).
16. Park, S.-J. *et al.* Draft genome sequence of an ammonia-oxidizing archaeon, “*Candidatus Nitrosopumilus koreensis*” AR1, from marine sediment. *J. Bacteriol.* **194**, 6940–6941 (2012).
17. Park, S. J. *et al.* Draft genome sequence of an ammonia-oxidizing archaeon, ‘*Candidatus Nitrosopumilus sediminis*’ AR2, from Svalbard in the arctic circle. *J. Bacteriol.* **194**, 6948–6949 (2012).
18. Kim, B. K. *et al.* Genome sequence of an ammonia-oxidizing soil archaeon, “*Candidatus Nitrosoarchaeum koreensis*” MY1. *J. Bacteriol.* **193**, 5539–5540 (2011).
19. Bayer, B. *et al.* Physiological and genomic characterization of two novel marine *thaumarchaeal* strains indicates niche differentiation. *ISME J.* **10**, 1051–1063 (2016).
20. Sauder, L. A. *et al.* Cultivation and characterization of *Candidatus Nitrosocosmicus* exaquare, an ammonia-oxidizing archaeon from a municipal wastewater treatment system. *ISME J.* **11**, 1142–1157 (2017).
21. Li, Y. *et al.* A novel ammonia-oxidizing archaeon from wastewater treatment plant: Its enrichment, physiological and genomic characteristics. *Sci. Rep.* **6**, (2016).
22. Jung, M.-Y. *et al.* A mesophilic, autotrophic, ammonia-oxidizing archaeon of *thaumarchaeal* group I.1a cultivated from a deep oligotrophic soil horizon. *Appl. Environ. Microbiol.* **80**, 3645–3655 (2014).

23. Spang, A. *et al.* The genome of the ammonia-oxidizing *Candidatus Nitrososphaera gargensis*: insights into metabolic versatility and environmental adaptations. *Environ. Microbiol.* **14**, 3122–3145 (2012).
24. Hugerth, L. W. *et al.* Metagenome-assembled genomes uncover a global brackish microbiome. *Genome Biol.* **16**, 279 (2015).
25. Lebedeva, E. V. *et al.* Enrichment and genome sequence of the group I. 1a ammonia-oxidizing archaeon ‘*Ca. Nitrosotenuis uzonensis*’ representing a clade globally distributed in thermal habitats. *Plos One* **8**, (2013).
26. Mende, D. R., Aylward, F. O., Eppley, J. M., Nielsen, T. N. & DeLong, E. F. Improved environmental genomes via integration of metagenomic and single-cell assemblies. *Front. Microbiol.* **7**, (2016).
27. Herbold CW, Lehtovirta-Morley LE, Jung M-Y, Jehmlich N, Hausmann B, Han P, *et al.* Ammonia-oxidising archaea living at low pH: Insights from comparative genomics. *Environ Microbiol*, in press (2017).
28. Stieglmeier M, Alves RJE, Schleper C. The Phylum Thaumarchaeota. In: Rosenberg E, DeLong EF, Lory S, Stackebrandt E, Thompson F (eds). *The Prokaryotes*. Springer Berlin Heidelberg, pp 347–362 (2014).
29. Pace HC and Brenner C. (2001). The nitrilase superfamily: classification, structure and function. *Genome Biol* **2**: reviews0001.1-reviews0001.9.
30. Gibson M, Chen P-T, Drennan CL. (2016). A structural phylogeny for understanding 2-oxoacid oxidoreductase function - ScienceDirect. *Curr Opin Struct Biol* **41**: 54–61.
31. Price, M. N., Dehal, P. S. & Arkin, A. P. FastTree: computing large minimum evolution trees with profiles instead of a distance matrix. *Mol. Biol. Evol.* **26**, 1641–50 (2009).
32. Katoh, K., Misawa, K., Kuma, K. & Miyata, T. MAFFT: a novel method for rapid multiple sequence alignment based on fast Fourier transform. *Nucleic Acids Res.* **30**, 3059–3066 (2002).
33. Makarova, K. S., Krupovic, M. & Koonin, E. V. Evolution of replicative DNA polymerases in archaea and their contributions to the eukaryotic replication machinery. *Front. Microbiol.* **5**, (2014).
